# Supplementary material
Source: publisher figshare collection journal article supplement (https://frontiersin.figshare.com/ndownloader/files/18146969)
Supplement: Supplementary file [file 18146969]

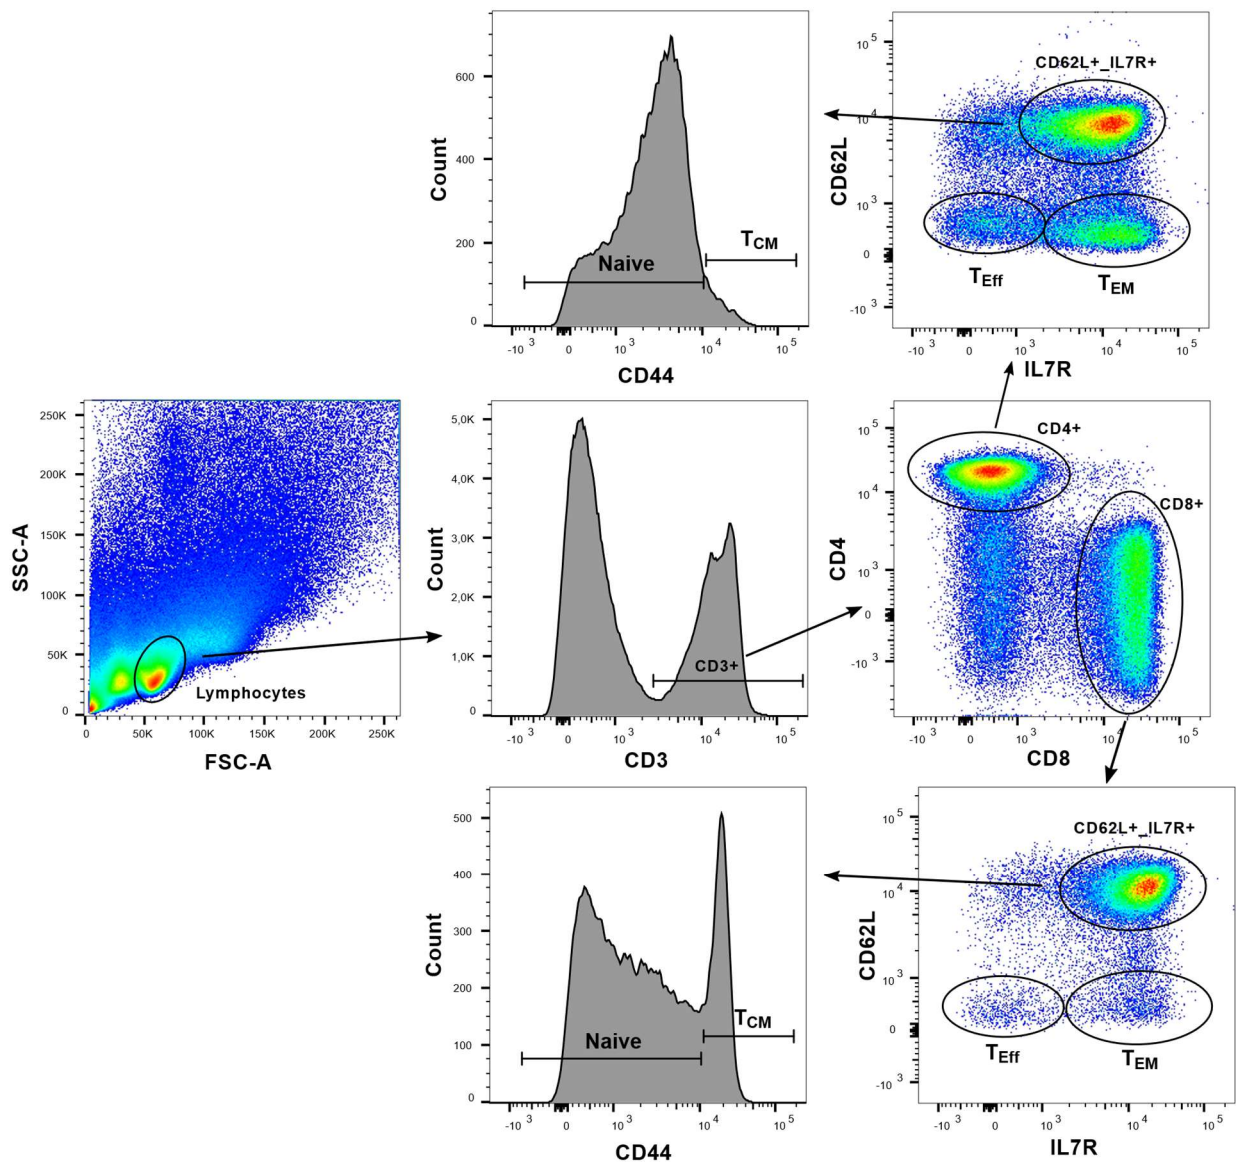

### Supplementary Figure 1. Gating strategy for mouse splenocytes

The different populations were classified as CD62L<sup>+</sup> IL-7R<sup>+</sup> CD44<sup>-</sup> (naïve), CD62L<sup>+</sup> IL-7R<sup>+</sup> CD44<sup>+</sup> (T<sub>CM</sub>), CD62L<sup>-</sup> IL-7R<sup>+</sup> (T<sub>EM</sub>), CD62L<sup>-</sup> IL-7R<sup>-</sup> (end-stage T<sub>Eff</sub>).
